# Supplementary material for: Small-Molecule Inhibitor Leads of Ribosome-Inactivating Proteins Developed Using the Doorstop Approach
Source: PubMed Central journal article supplement (PMC3063779; doi:10.1371/journal.pone.0017883), 2011-03-24

# R16b HPLC Chromatogram

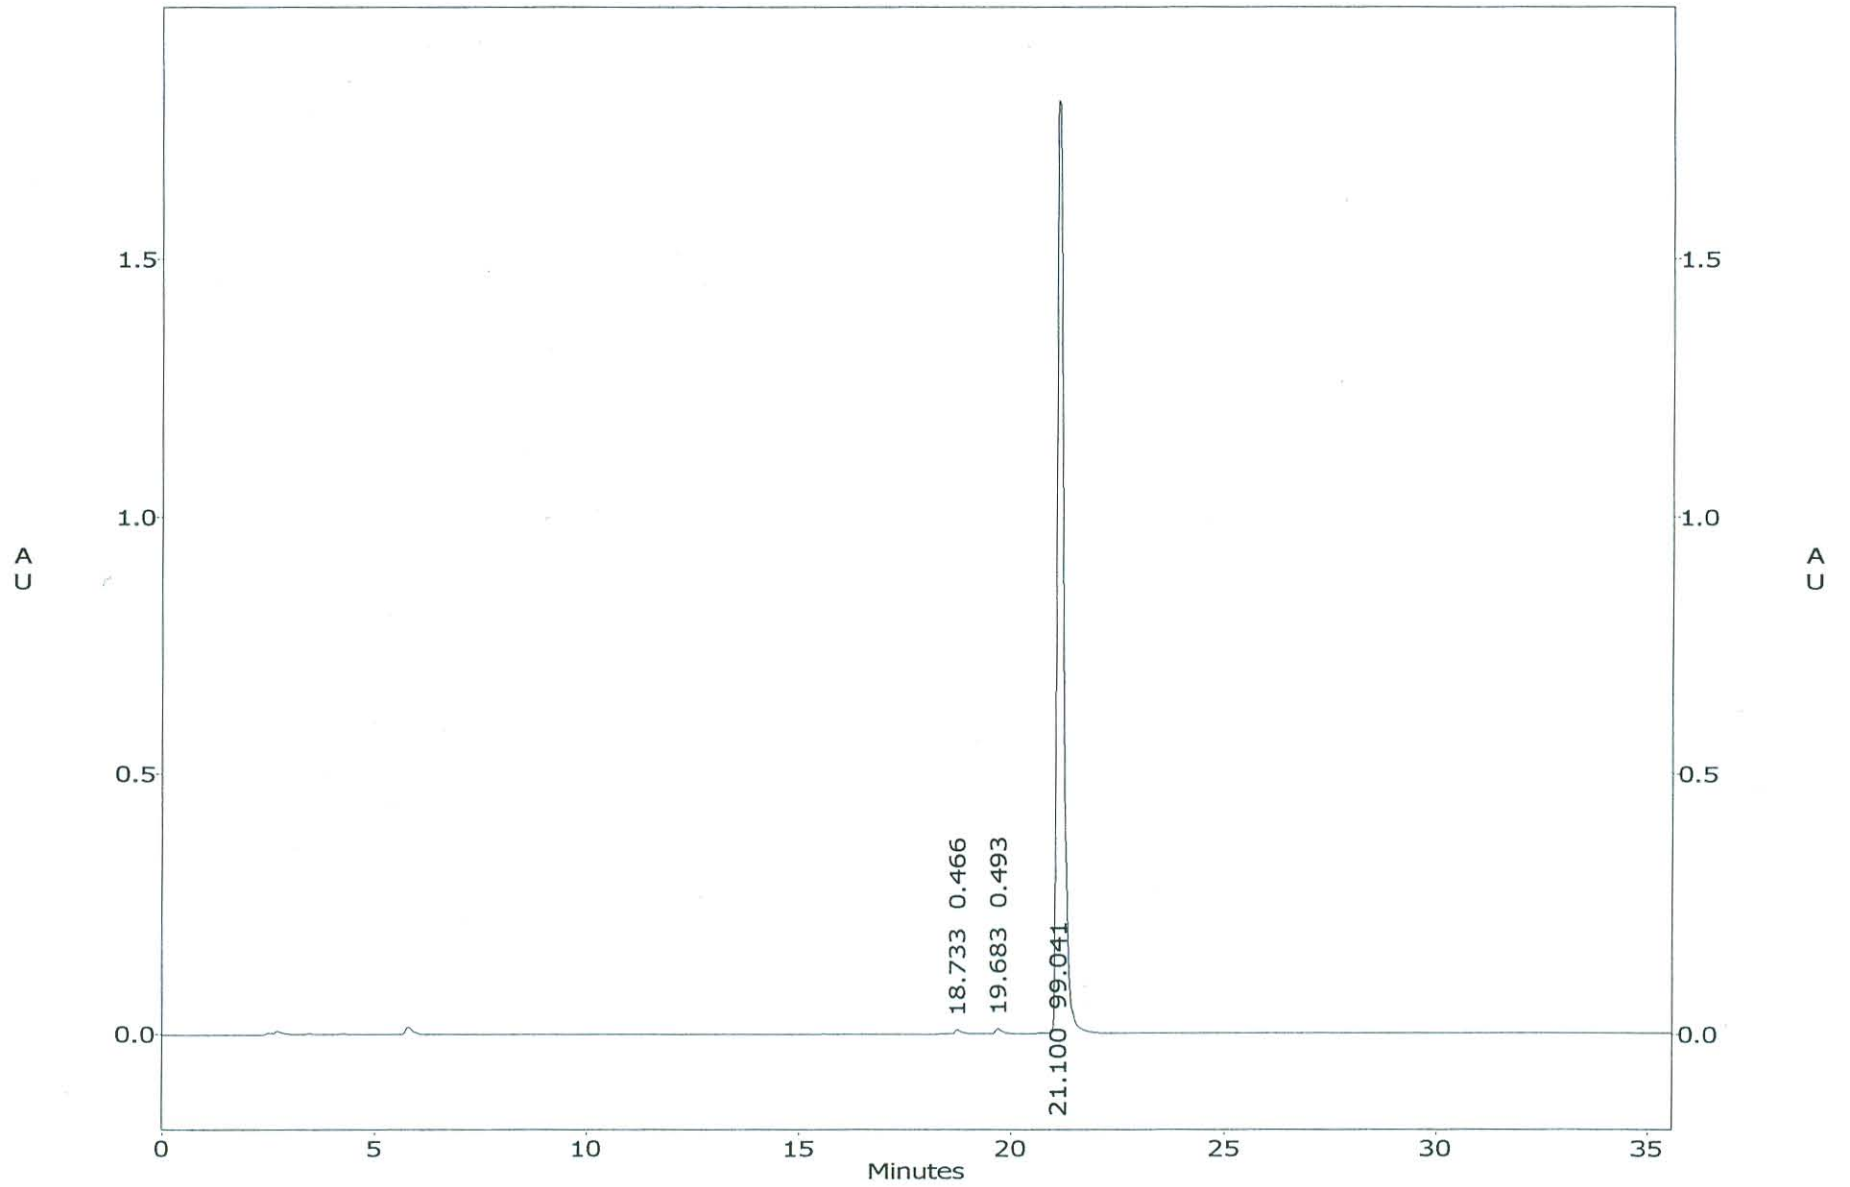

Supplement: pone.0017883.s002.pdf [file pone.0017883.s002.pdf]
